# Supplementary material for: Construction of superhydrophilic FeP–Ni 2 P–CoP/NF enriched interfacial heterostructures for promoting efficient and stable overall water splitting under large currents
Source: Royal Society of Chemistry journal article supplement (doi:10.1039/d4qi02841d), 2025-01-01
Supplement: d4qi02841d1.pdf [file d4qi02841d1.pdf]

## Supporting Information

### Construction of superhydrophilic FeP-Ni<sub>2</sub>P-CoP/NF enriched interfacial heterostructures for promoting efficient and stable overall water splitting under large currents

Yaxuan Jin<sup>a</sup>, Weiyan Ma<sup>a</sup>, Dong Sun<sup>a</sup>, Wan Wan<sup>a</sup>, Lirong Jia<sup>a</sup>, Yuling Tu<sup>a</sup>, Dejun Gong<sup>a</sup>,  
Wanyong, Zhou<sup>b</sup>, Hui Chai<sup>a,\*</sup>

<sup>a</sup>State Key Laboratory of Chemistry and Utilization of Carbon Based Energy Resources, Key Laboratory of Energy Materials Chemistry, Ministry of Education; College of Chemistry, Xinjiang University, Urumqi, 830017, Xinjiang, PR China

<sup>b</sup>College of Chemical Engineering, Xinjiang University, Urumqi, Xinjiang, PR China

\*Corresponding author: Tel: +86 9918583083; Fax: +86 9918588883; E-mail: [huichmails@163.com](mailto:huichmails@163.com)

## Experimental section

### Chemicals

Cobalt(II) nitrate hexahydrate (Co(NO<sub>3</sub>)<sub>2</sub>·6 H<sub>2</sub>O), nickel (II) nitrate hexahydrate (Ni(NO<sub>3</sub>)<sub>2</sub>·6 H<sub>2</sub>O), Iron (III) nitrate nonahydrate (Fe(NO<sub>3</sub>)<sub>3</sub>·9 H<sub>2</sub>O), ammonium fluoride (NH<sub>4</sub>F), urea (CO(NH<sub>2</sub>)<sub>2</sub>), potassium hydroxide (KOH) and Ethanol (C<sub>2</sub>H<sub>5</sub>OH) were purchased from Sinopharm Chemical Reagent Co., Ltd (Shanghai, China). Pt/C (20 wt.%) and ruthenium (IV) oxide (RuO<sub>2</sub>) were purchased from Alfa Aesar. Nafion (5 wt.%) was purchased from Sigma-Aldrich Sodium. Hypophosphite (NaH<sub>2</sub>PO<sub>2</sub>) was purchased from Aladdin. All chemical reagents were used as received without further purification. Nickel foam (NF) was purchased from Kunshan Shengshijing New Materials Co., Ltd (Kunshan, China).

### Synthesis of Fe-Ni(OH)<sub>2</sub>-Co(OH)<sub>2</sub>/NF catalyst

Nickel foam (4.0×4.0 cm<sup>2</sup>) was sonicated in 1.0 M HCl aqueous solution for 15 min to remove surface impurities, washed to neutrality and then sonicated with deionized water and anhydrous ethanol alternately for 10 min. The cleaned nickel foam was dried in vacuum at 60°C

for 8 h for reserve.

First, 0.8731 g of  $(\text{Co}(\text{NO}_3)_2 \cdot 6 \text{H}_2\text{O})$ , 0.2908 g of  $\text{Ni}(\text{NO}_3)_2 \cdot 6 \text{H}_2\text{O}$ , 0.2828 g of  $\text{Fe}(\text{NO}_3)_3 \cdot 9 \text{H}_2\text{O}$ , 0.0741 g of  $\text{NH}_4\text{F}$ , and 0.2402 g of urea were added to 25 mL of deionized water. A piece of pretreated NF ( $1.5 \text{ cm} \times 3 \text{ cm}$ ) was added with magnetic stirring for 30 min and transferred to a Teflon-lined autoclave. The autoclave was heated at  $150^\circ\text{C}$  for 6 hours. After cooling naturally to room temperature, the sample was washed three times with deionized water and ethanol, and dried under vacuum at  $60^\circ\text{C}$  for 8 h. The synthesized sample was noted as  $\text{Fe-Ni}(\text{OH})_2\text{-Co}(\text{OH})_2/\text{NF}$ . For comparison,  $\text{Ni}(\text{OH})_2\text{-Co}(\text{OH})_2/\text{NF}$  was prepared in the same way as  $\text{Fe-Ni}(\text{OH})_2\text{-Co}(\text{OH})_2/\text{NF}$  except that no iron source was added.  $\text{Ni}(\text{OH})_2/\text{NF}$ ,  $\text{Co}(\text{OH})_2/\text{NF}$  and  $\text{Fe}(\text{OH})_3/\text{NF}$  were prepared in a similar manner.

#### **Synthesis of FeP-Ni<sub>2</sub>P-CoP/NF catalyst**

The  $\text{Fe-Ni}(\text{OH})_2\text{-Co}(\text{OH})_2/\text{NF}$  precursor and 2.0 g of  $\text{NaH}_2\text{PO}_2$  were placed in a tube furnace, with  $\text{NaH}_2\text{PO}_2$  upstream and the precursor downstream, and then the temperature was increased to  $350^\circ\text{C}$  at  $2^\circ\text{C min}^{-1}$ , and the temperature was held at  $350^\circ\text{C}$  for 2 h to obtain  $\text{FeP-Ni}_2\text{P-CoP/NF}$ .  $\text{Ni}_2\text{P-CoP/NF}$  was prepared in the same way as  $\text{FeP-Ni}_2\text{P-CoP/NF}$ .  $\text{Ni}_2\text{P/NF}$ ,  $\text{CoP/NF}$  and  $\text{FeP/NF}$  were prepared in a similar manner.

#### **Synthesis of Pt-C/NF and RuO<sub>2</sub>/NF catalysts**

2.5 mg of Pt, add 370  $\mu\text{L}$  of isopropanol, 30  $\mu\text{L}$  of Nafion, 100  $\mu\text{L}$  of deionized water, sonicate for 1 h to obtain a uniformly dispersed ink, drop the prepared ink uniformly onto a clean  $1.0 \times 1.0 \text{ cm}^2$  nickel foam, and dry it at room temperature to obtain Pt-C/NF.  $\text{RuO}_2/\text{NF}$  is prepared in the same way as Pt-C/NF, with the addition of 1 mg of carbon black. The loading of  $\text{RuO}_2/\text{NF}$  and Pt-C/NF was  $1 \text{ mg cm}^{-2}$ .

#### **Materials characterizations**

X-ray diffraction (XRD) measurements were carried out on a Bruker D8 Advance X-ray diffractometer with a Cu  $K\alpha$  source ( $\lambda = 1.5406 \text{ \AA}$ ). The morphology and components of the samples were obtained through a field emission scanning electron microscope (SEM, Hitachi S-4800) equipped with an energy dispersive spectrometer (EDS) and transmission electron

microscopy (TEM) with a JEOL JEM-2800. Raman spectra were measured by a Bruker Senterra R200-L spectrometer (532 nm). The electronic states of the samples were investigated by the X-ray photoelectron spectroscopy (XPS, Thermo Fisher Scientific K-Alpha with Al K $\alpha$  radiation). All binding energies were calibrated by the C 1s peak at 284.8 eV. The contents of Fe, Co, and Ni in the electrolyte after OER were determined by an inductively coupled plasma-optical emission spectrometer (ICP-OES, Agilent 5110). Water contact angle measurements were performed using a Dataphysics OAC 25 instrument. In this context, 3  $\mu$ L droplets of DI water was adapted as working medium to drop onto sample glass slide to perform contact angle analysis.( or 3  $\mu$ L n-hexane droplets as working medium.)

## Electrochemical measurements

Electrochemical measurements were performed on a CHI 760E electrochemical workstation with a standard three-electrode system. Graphite rod and Hg/HgO electrode were employed as a counter electrode and a reference electrode, respectively. The electrochemical performances were evaluated in 1.0 M KOH solution. All the potentials were calibrated to the reversible hydrogen electrode (RHE) through the following equation:

$$E_{\text{RHE}} = E_{\text{Hg/HgO}} + 0.098 \text{ V} + 0.059\text{pH}$$

Linear sweep voltammetry (LSV) were performed at a scan rate of 5 mV s<sup>-1</sup> by 100%-iR compensation. Electrochemical impedance spectroscopy (EIS) measurements were recorded over a frequency ranging from 100 kHz to 0.1Hz with an potential amplitude of 5 mV at a constant overpotential of 338 mV. The durability test was carried out by taking continuous potential cycling at a scan rate of 100 mV s<sup>-1</sup> for 5000 cycles. The electrochemical double-layer capacitance (Cdl) was determined from cyclic voltammograms measured in a non-Faradaic region with the scan rates of 20, 40, 60, 80, and 100 mV s<sup>-1</sup>. The ECSA of the prepared electrocatalysts were evaluated by measuring the Cdl via CV measurements at different scan rates in the potential range without the redox process. The ECSA was derived from the equation: ECSA = Cdl / Cs, where Cs is the specific capacitance. In this work, 0.04 mF cm<sup>-2</sup> was adopted as the value of Cs. The density of the ECSA-normalized LSV curves was calculated by the equation: ECSA-normalized current

density = current density  $\times$  Cs / Cdl. The Faradaic efficiencies of the OER and HER on the FeP-Ni<sub>2</sub>P-CoP/NF was obtained by the ratio of the amount of O<sub>2</sub> (or H<sub>2</sub>) experimentally collected by a drainage method to the amount of corresponding gas theoretically calculated. The overall water splitting tests were performed in a twoelectrode system with the FeP-Ni<sub>2</sub>P-CoP/NF as both cathode and anode. For the benchmark noble metal-based catalysts, RuO<sub>2</sub>||Pt/C utilized the same mass loading as FeP-Ni<sub>2</sub>P-CoP/NF||FeP-Ni<sub>2</sub>P-CoP/NF.

### Faradaic efficiency calculation

The working electrode was prepared by tailoring the FeP-Ni<sub>2</sub>P-CoP/NF electrode with a surface area of 1 cm<sup>2</sup>. A constant electrical current at 0.1 A was applied on the electrode and the volume of the evolved gas was recorded synchronously. Thus, the faradaic yield was calculated from the ratio of  $V_{\text{experimental}}$  (the recorded gas volume) to  $V_{\text{theoretical}}$  (the theoretical gas volume) during the charge transport process.

$$\text{Faradaic yield} = \frac{V_{\text{experimental}}}{V_{\text{theoretical}}} = \frac{m}{\frac{I}{n} \times \frac{t}{F}} = \frac{m \times F}{I \times t}$$

where  $m = P\Delta V/RT$  ( $P = P_0 - \rho gh = 1.01 \times 10^5 \text{ Pa} - 10^3 \times 10 \times 0.1 \text{ Pa} = 10^5 \text{ Pa}$ ,  $\rho$  is the density of water,  $h$  is the height of liquid in graduated cylinder: about 0.1 m,  $P_0$  is the atmosphere pressure);  $\Delta V$  is the change value of gas in graduated cylinder;  $R$  is a constant value of 8.314;  $T$  is the value of 298 K;  $F$  is Faraday constant (96485.3 C mol<sup>-1</sup>),  $n = 2/4$  means 2/4-mole electrons per mole H<sub>2</sub>/O<sub>2</sub>.

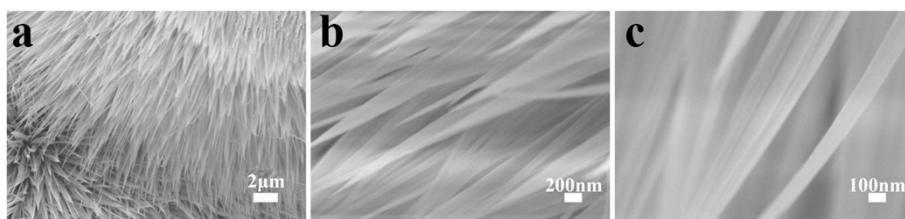

**Fig. S1.** SEM images of Fe-Ni(OH)<sub>2</sub>-Co(OH)<sub>2</sub> /NF with different magnifications.

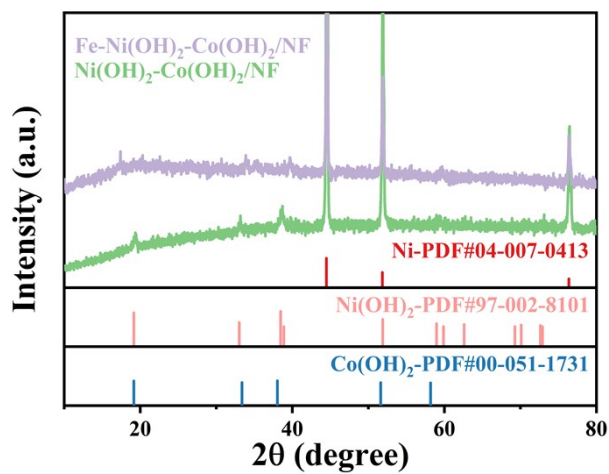

**Fig. S2.** XRD patterns of Fe-Ni(OH)<sub>2</sub>-Co(OH)<sub>2</sub>/NF.

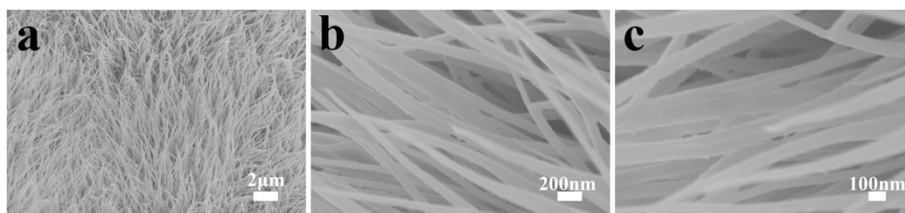

**Fig. S3.** SEM images of Ni<sub>2</sub>P-CoP/NF with different magnifications.

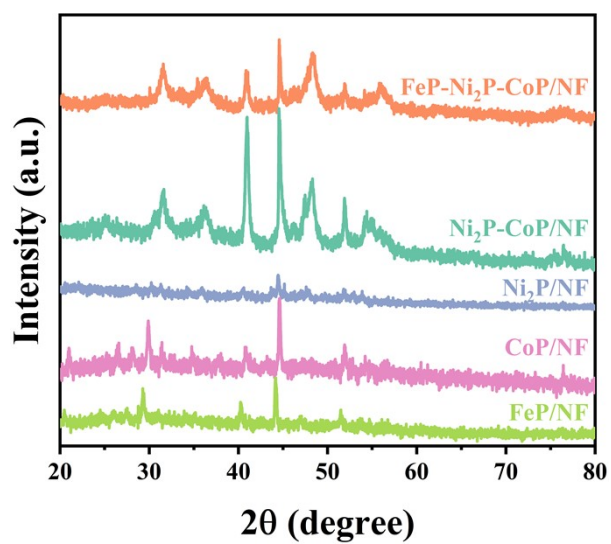

**Fig. S4.** XRD patterns of FeP-Ni<sub>2</sub>P-CoP/NF, Ni<sub>2</sub>P-CoP/NF, Ni<sub>3</sub>P/NF, CoP/NF and FeP /NF.

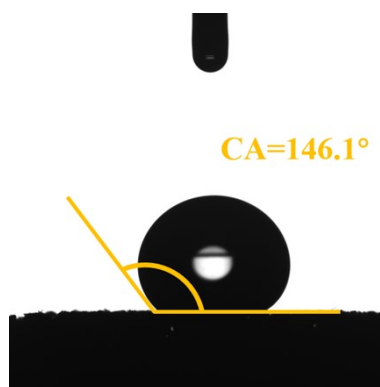

**Fig. S5.** Lipophilic contact angle of FeP-Ni<sub>2</sub>P-CoP/NF.

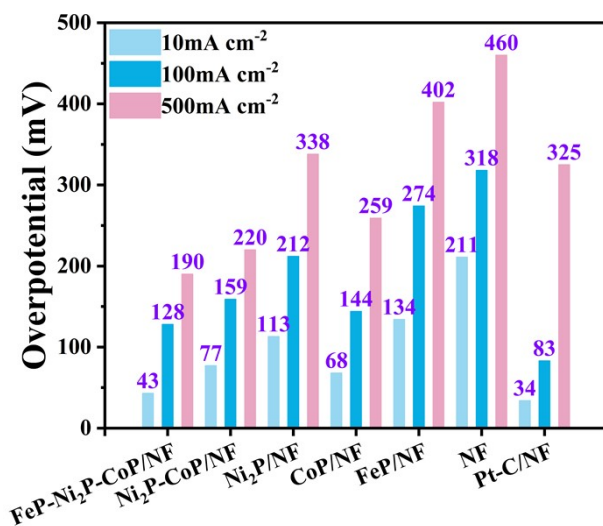

Fig. S6. HER Overpotential at 10, 100 and 500 mA cm<sup>-2</sup>.

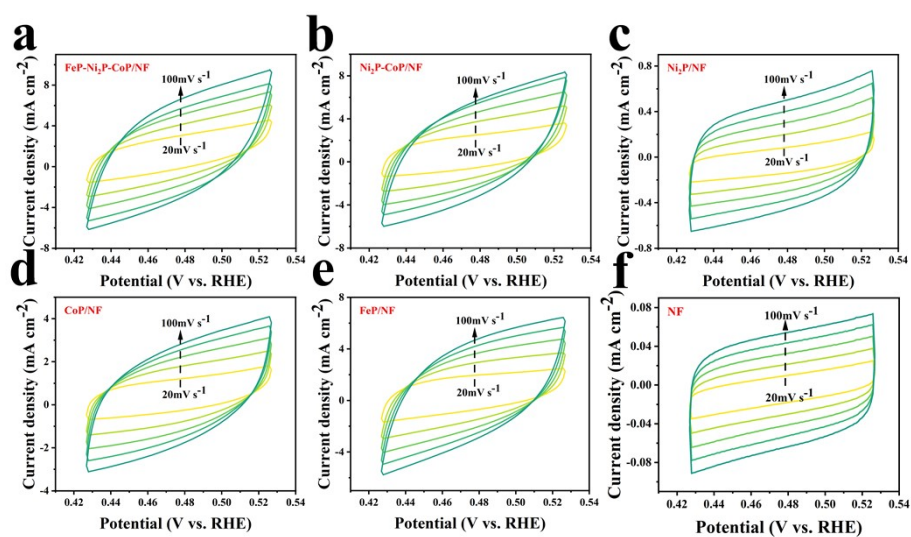

Fig. S7. Cyclic voltammograms (CV) for (a) FeP-Ni<sub>2</sub>P-CoP/NF, (b) Ni<sub>2</sub>P-CoP/NF, (c) Ni<sub>2</sub>P/NF, (d) CoP/NF, (e) FeP/NF, and (f) NF at different scan rate with 20, 40, 60, 80 and 100 mV s<sup>-1</sup>.

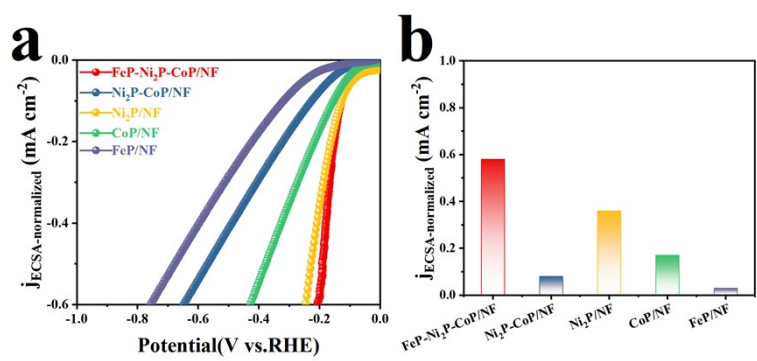

**Fig. S8.** (a) Specific activities (currents normalized to ECSA) of the FeP-Ni<sub>2</sub>P-CoP/NF, Ni<sub>2</sub>P-CoP/NF, Ni<sub>2</sub>P/NF, CoP/NF, and FeP/NF as a function of applied potential. (b) specific activity at an overpotential of 200 mV.

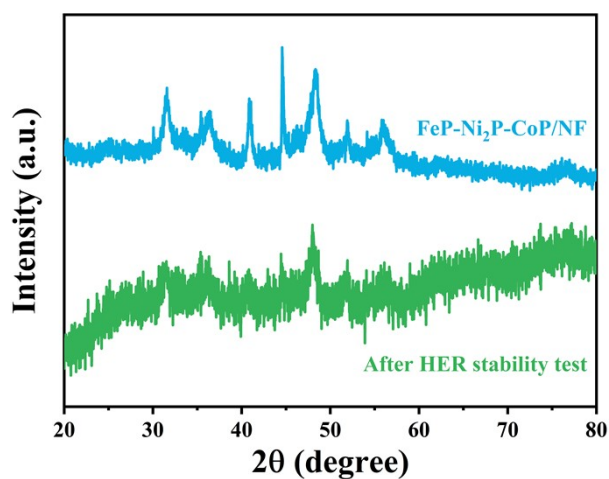

**Fig. S9.** XRD patterns of FeP-Ni<sub>2</sub>P-CoP/NF at initial and after HER stability test.

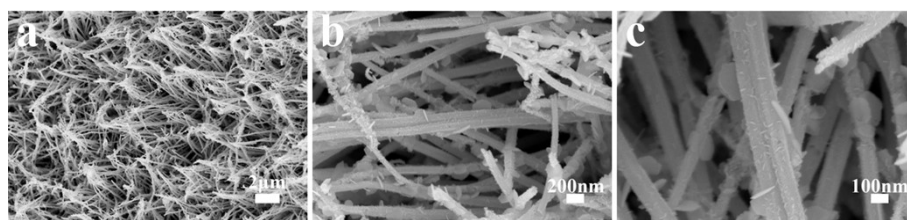

**Fig. S10.** SEM images of the FeP-Ni<sub>2</sub>P-CoP/NF after HER stability test.

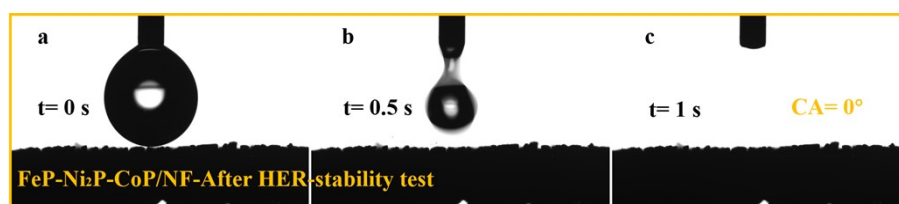

**Fig. S11.** Wetting characteristics and apparent morphology of FeP-Ni<sub>2</sub>P-CoP/NF after HER



stability

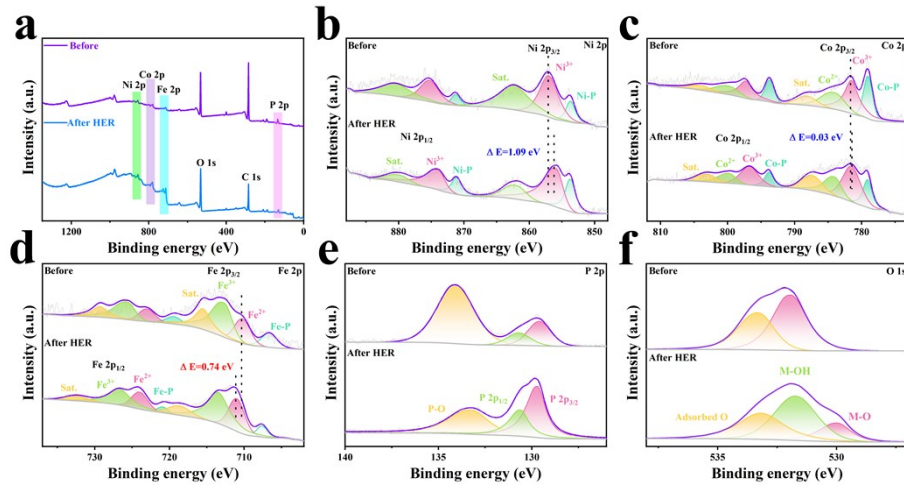

**Fig. S12.** (a) XPS survey scans of the FeP-Ni<sub>2</sub>P-CoP/NF before and after HER stability tests. High-resolution XPS spectra of (b) Ni 2p, (c) Co 2p, (d) Fe 2p, (e) P 2p and (f) O 1s for the FeP-Ni<sub>2</sub>P-CoP/NF after HER stability test in 1.0 M KOH.

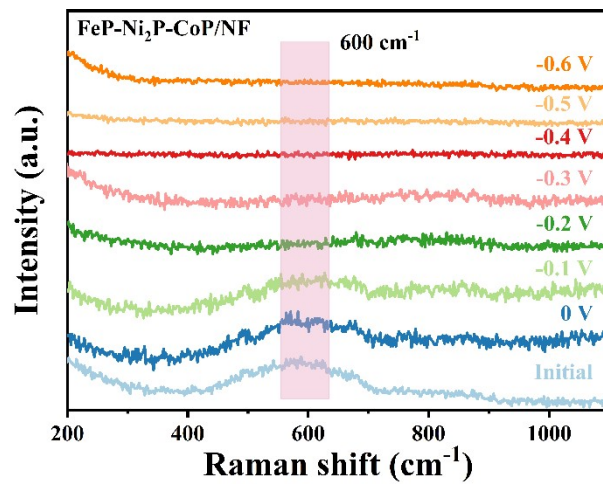

**Fig. S13.** In situ Raman spectra of FeP-Ni<sub>2</sub>P-CoP/NF at various potentials in HER.

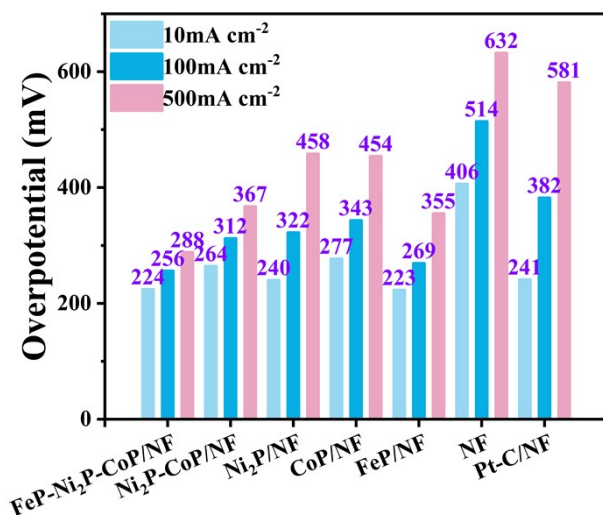

Fig. S14. OER Overpotential at 10, 100 and 500 mA cm<sup>-2</sup>.

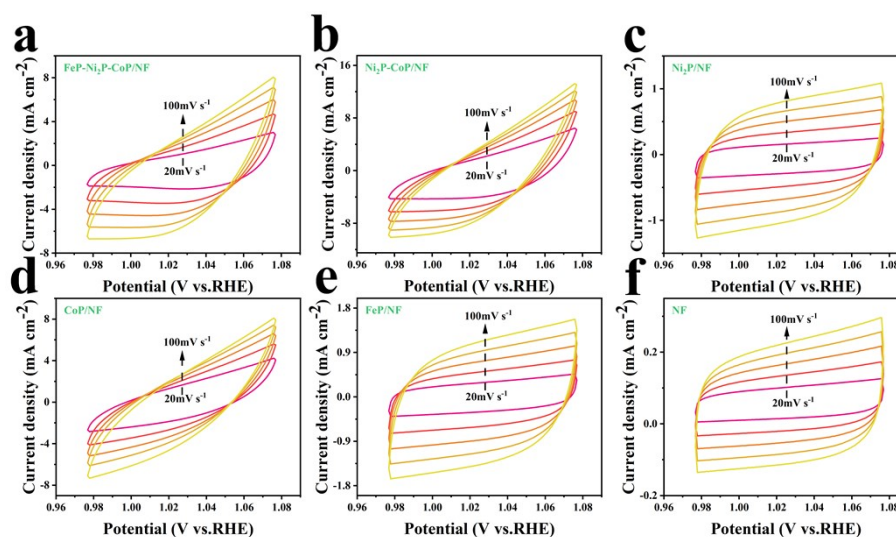

Fig. S15. Cyclic voltammograms (CV) for (a) FeP-Ni<sub>2</sub>P-CoP/NF, (b) Ni<sub>2</sub>P-CoP/NF, (c) Ni<sub>2</sub>P/NF, (d) CoP/NF, (e) FeP/NF, and (f) NF at different scan rate with 20, 40, 60, 80 and 100 mV s<sup>-1</sup>.

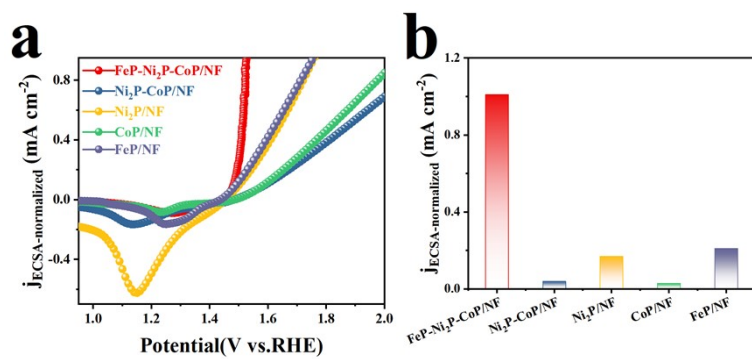

**Fig. S16.** (a) Specific activities (currents normalized to ECSA) of the FeP-Ni<sub>2</sub>P-CoP/NF, Ni<sub>2</sub>P-CoP/NF, Ni<sub>2</sub>P/NF, CoP/NF, and FeP/NF as a function of applied potential. (b) specific activity at an overpotential of 300 mV.

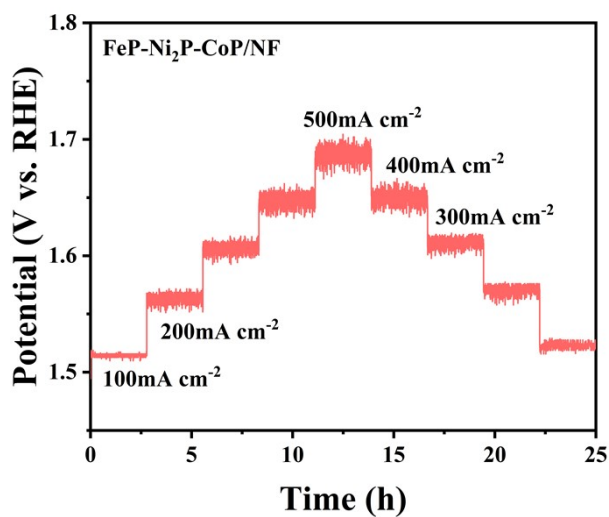

**Fig. S17.** Multi-step chronopotentiometric curves of FeP-Ni<sub>2</sub>P-CoP/NF.

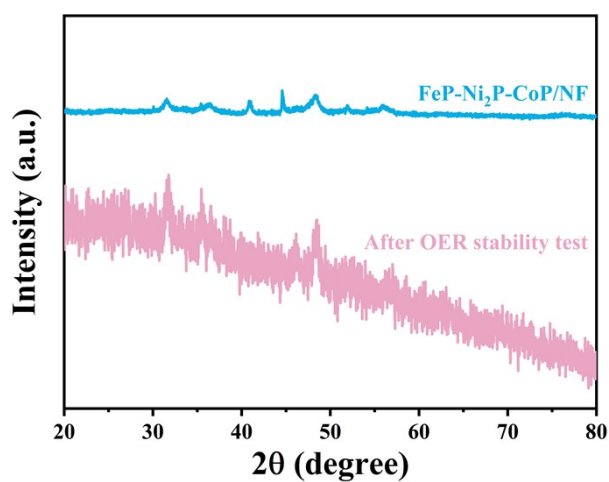

**Fig. S18.** XRD patterns of FeP-Ni<sub>2</sub>P-CoP/NF at initial and after OER stability test.

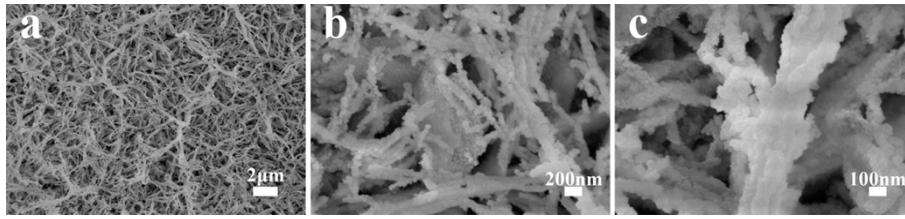

**Fig. S19.** SEM images of the FeP-Ni<sub>2</sub>P-CoP/NF after OER stability test.

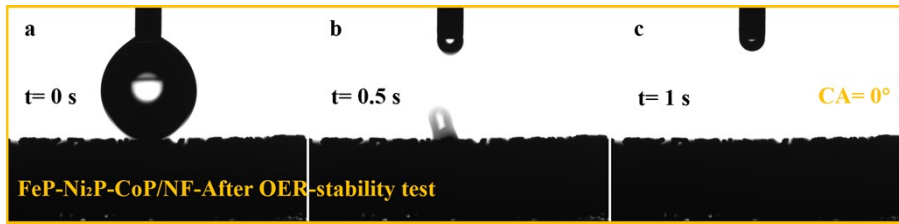

**Fig. S20.** Wetting characteristics and apparent morphology of FeP-Ni<sub>2</sub>P-CoP/NF after OER stability

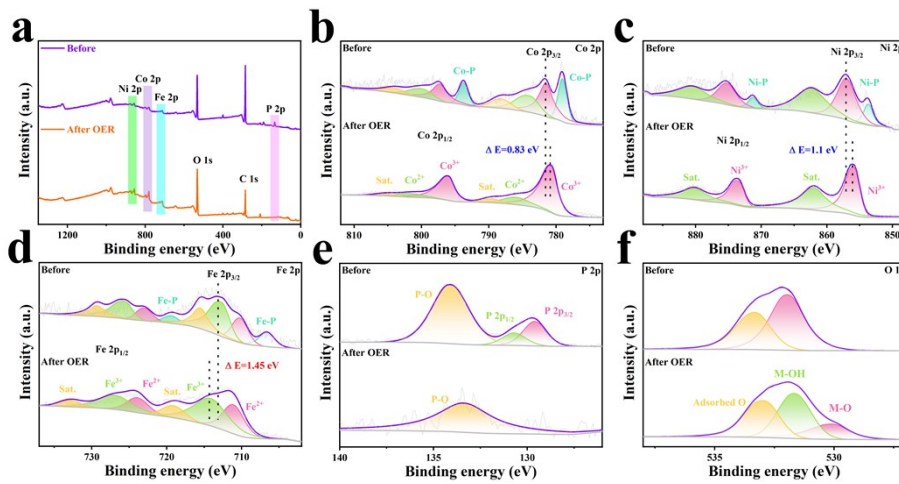

**Fig. S21.** (a) XPS survey scans of the FeP-Ni<sub>2</sub>P-CoP/NF before and after OER stability tests. High-resolution XPS spectra of (b) Co 2p, (c) Ni 2p, (d) Fe 2p, (e) P 2p and (f) O 1s for the FeP-Ni<sub>2</sub>P-CoP/NF after OER stability test in 1.0 M KOH.

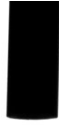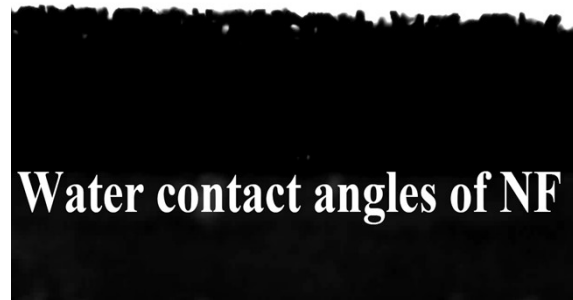

**Video S1.** Water contact angles of NF.

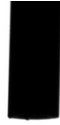

## Water contact angles of FeP-Ni<sub>2</sub>P-CoP/NF

**Video S2.** Water contact angles of FeP-Ni<sub>2</sub>P-CoP/NF.

**Table S1.** Comparisons of HER performances of FeP-Ni<sub>2</sub>P-CoP/NF with previously reported nonprecious metal-based and some precious metal-based electrocatalysts in 1.0 M KOH.

| Catalysts                                    | Overpotential<br>(mV)<br>at 100 mA cm <sup>-2</sup> | Tafel slope<br>(mV dec <sup>-1</sup> ) | Stability<br>(h) @<br>J (mA·cm <sup>-2</sup> ) | Reference        |
|----------------------------------------------|-----------------------------------------------------|----------------------------------------|------------------------------------------------|------------------|
| FeP-Ni <sub>2</sub> P-CoP/NF                 | 128                                                 | 78.47                                  | 500@1000                                       | <b>This work</b> |
| Ni/Mo <sub>2</sub> C-NCSs                    | 131                                                 | 66                                     | 24@100                                         | 1                |
| PE-Cr-CoMoO <sub>4</sub>                     | 131                                                 | 71.5                                   | 24@50                                          | 2                |
| r-Mn-Ni/CoP                                  | 134                                                 | 43.3                                   | 200@100                                        | 3                |
| NiMoP/NF                                     | 135                                                 | 81.9                                   | 100@10                                         | 4                |
| Fe-CoB <sub>i</sub> /CoP/NF                  | 137                                                 | 75.3                                   | 100@50                                         | 5                |
| CoP/Ni <sub>5</sub> P <sub>4</sub> /CoP      | 140                                                 | 58                                     | 21@500                                         | 6                |
| CoTe <sub>2</sub> /CoP                       | 148                                                 | 57                                     | 20@100                                         | 7                |
| FeMoSN@NC                                    | 150                                                 | 67                                     | 12@100                                         | 8                |
| MOF-MoS <sub>A</sub> W <sub>SA</sub>         | 173                                                 | 82.4                                   | 50@100                                         | 9                |
| Ni-W-P@HFC                                   | 180                                                 | 58.9                                   | 70@100                                         | 10               |
| Mn-W-CoP/NF                                  | 184.8                                               | 73.4                                   | 24@100                                         | 11               |
| FeCoCrCuO <sub>x</sub> @CF                   | 189                                                 | 27.3                                   | 165@500                                        | 12               |
| CoP@NPCNTs/CTs                               | 191.1                                               | 56                                     | 72@20                                          | 13               |
| CoFe-LDH@NiCoP/NF                            | 196                                                 | 53.04                                  | 100@100                                        | 14               |
| Mo-Ni <sub>3</sub> S <sub>2</sub> /NF        | 199                                                 | 80.7                                   | 100@120                                        | 15               |
| Ni <sub>2</sub> P@C/NF                       | 219                                                 | 63.8                                   | 48@10                                          | 16               |
| Mo-NiS/Ni <sub>3</sub> S <sub>2</sub> -0.08S | 230                                                 | 115.7                                  | 30@100                                         | 17               |
| CoNiFe-PS                                    | 235                                                 | 110.58                                 | 100@10                                         | 18               |
| Fe-NiP                                       | 252                                                 | 103.6                                  | 24@100                                         | 19               |
| CoNiCu-LDH@CuO/CF                            | 268                                                 | 88.4                                   | 24@100                                         | 20               |

**Table S2.** Comparisons of OER performances of FeP-Ni<sub>2</sub>P-CoP/NF with recently reported nonprecious metal-based catalysts and some precious metal-based electrocatalysts in 1.0 M KOH.

| Catalysts                                            | Overpotential<br>(mV)<br>at 100 mA cm <sup>-2</sup> | Tafel slope<br>(mV dec <sup>-1</sup> ) | Stability<br>(h) @<br>J (mA·cm <sup>-2</sup> ) | Reference        |
|------------------------------------------------------|-----------------------------------------------------|----------------------------------------|------------------------------------------------|------------------|
| FeP-Ni <sub>2</sub> P-CoP/NF                         | 256                                                 | 51.57                                  | 500@1000                                       | <b>This work</b> |
| Fe-CoBi/CoP/NF                                       | 260                                                 | 61.9                                   | 100@50                                         | 5                |
| CoNiFe-PS                                            | 263                                                 | 35.81                                  | 100@10                                         | 18               |
| (Fe,Ni) <sub>2</sub> P@Ni <sub>2</sub> P             | 268                                                 | 56                                     | 65@1000                                        | 21               |
| Fe-NiP                                               | 270                                                 | 43.6                                   | 24@100                                         | 19               |
| Mo-NiS <sub>x</sub> @NiFe-LDH/NF                     | 271                                                 | 44.41                                  | 72@200                                         | 22               |
| P-NiFeMo/NF                                          | 274                                                 | 57.1                                   | 72@500                                         | 23               |
| CoFe-LDH@NiCoP/NF                                    | 275                                                 | 63.02                                  | 100@200                                        | 14               |
| H-NMO/CMO/CF-450                                     | 281                                                 | 39.13                                  | 300@100                                        | 24               |
| CoNiCu-LDH@CuO/CF                                    | 286                                                 | 70.6                                   | 24@100                                         | 20               |
| CoP@Ni <sub>2</sub> P-Fe <sub>2</sub> P              | 287                                                 | 70                                     | 40@100                                         | 25               |
| Mo-Ni <sub>3</sub> S <sub>2</sub> /NF                | 292                                                 | 31                                     | 100@100                                        | 15               |
| Fe/Mo <sub>2</sub> C-NCSs                            | 293                                                 | 86                                     | 24@100                                         | 1                |
| Ni <sub>2</sub> P@C/NF                               | 294                                                 | 63                                     | 48@10                                          | 16               |
| PdFeCo <sub>3-x</sub> O <sub>4</sub> /NF             | 300                                                 | 52                                     | 50@500                                         | 26               |
| MXene@RuCo NPs                                       | 309                                                 | 61.3                                   |                                                | 27               |
| MoP-Mo <sub>2</sub> C/NPC                            | 330                                                 | 44.77                                  | 90@100                                         | 28               |
| Co <sub>2</sub> P-Ni <sub>3</sub> S <sub>2</sub> /NF | 332                                                 | 31.6                                   | 48@100                                         | 29               |
| Mn-W-CoP/NF                                          | 333.2                                               | 83.4                                   | 100@100                                        | 11               |
| CoPONPCNTs/CTs                                       | 349.1                                               | 76.3                                   | 72@20                                          | 13               |
| CoTe <sub>2</sub> /CoP                               | 354                                                 | 89                                     | 30@20                                          | 7                |
| Ni-W-P@HFC                                           | 380                                                 | 88.3                                   | 100@80                                         | 10               |
| FeP-350/NF                                           | 388                                                 | 168.7                                  | 24@15                                          | 30               |



**Table S3.** Comparisons of the overall water splitting activity of FeP-Ni<sub>2</sub>P-CoP/NF||FeP-Ni<sub>2</sub>P-CoP/NF with other electrocatalysts at a current density of 10 mA cm<sup>-2</sup> in 1.0 M KOH

| Catalysts                                                        | Potential (V) | Stability (h) @ J (mA·cm <sup>-2</sup> ) | Reference        |
|------------------------------------------------------------------|---------------|------------------------------------------|------------------|
| FeP-Ni <sub>2</sub> P-CoP/NF                                     | 1.5           | 500@1000                                 | <b>This work</b> |
| MOF-Mo <sub>SA</sub> W <sub>SA</sub>                             | 1.501         | 56@500                                   | 9                |
| CoP@Ni <sub>2</sub> P-Fe <sub>2</sub> P                          | 1.51          | 100@500                                  | 25               |
| NF/O-CoP                                                         | 1.51          | 24@20                                    | 31               |
| CoFe-LDH@NiSe                                                    | 1.51          | 120@10                                   | 32               |
| Fe-Ni <sub>2</sub> P/CeO <sub>2</sub>                            | 1.52          | 120@1000                                 | 33               |
| MXene@RuCo NPs                                                   | 1.52          |                                          | 27               |
| Fe <sub>2</sub> P-CoP/CeO <sub>2</sub> -20                       | 1.52          | 40@500                                   | 34               |
| Mo-Ni <sub>3</sub> S <sub>2</sub> /NF                            | 1.52          | 100@100                                  | 15               |
| FeCoCrCuO <sub>x</sub> @CF                                       | 1.528         | 100@500                                  | 12               |
| Co <sub>2</sub> P-Ni <sub>3</sub> S <sub>2</sub> /NF             | 1.54          | 24@100                                   | 29               |
| Mo-NiS <sub>x</sub> @NiFe-LDH/NF                                 | 1.54          | 72@200                                   | 22               |
| MoP-Mo <sub>2</sub> C/NPC                                        | 1.55          | 168@100                                  | 28               |
| CoTe <sub>2</sub> /CoP                                           | 1.55          | 12@50                                    | 7                |
| Ni <sub>2</sub> P@C/NF                                           | 1.55          | 48@10                                    | 16               |
| NiFeCd-LDH                                                       | 1.57          | 25@10                                    | 35               |
| Mn-W-CoP/NF                                                      | 1.57          | 48@15                                    | 11               |
| Co <sub>1</sub> Mo <sub>1</sub> Ni <sub>0.5</sub> P <sub>1</sub> | 1.59          | 100@100                                  | 36               |
| Fe-NiP                                                           | 1.59          | 60@10                                    | 19               |
| CoP/FeP/CP                                                       | 1.62          | 60@10                                    | 37               |
| B-CoO/Co@NC/NF(Ar)                                               | 1.62          | 100@10                                   | 38               |
| N-NiMoO <sub>4</sub> /Ni/CNTs                                    | 1.64          | 12@10                                    | 39               |
| CoP/Ti <sub>3</sub> C <sub>2</sub> T <sub>x</sub>                | 1.66          | 24@10                                    | 40               |
| Mn-CP NTs                                                        | 1.67          | 60@10                                    | 41               |

**Table S4.** ICP-OES analysis of element content before and after OER stability test reaction of FeP-Ni<sub>2</sub>P-CoP/NF.

| <b>Sample</b> | <b>Fe(Wt%)</b> | <b>Co(Wt%)</b> | <b>Ni(Wt%)</b> | <b>Composition</b>           |
|---------------|----------------|----------------|----------------|------------------------------|
| Before        | 4.21           | 8.05           | 87.47          | FeP-Ni <sub>2</sub> P-CoP/NF |
| After         | 2.59           | 5.73           | 90.00          | FeP-Ni <sub>2</sub> P-CoP/NF |

**Table S5.** The content of the metal ions in the electrolyte after OER determined by ICP-OES.

| <b>elements</b> | <b>Fe</b> | <b>Co</b> | <b>Ni</b> |
|-----------------|-----------|-----------|-----------|
| mg/L            | 0.065     | 0.024     | 0.009     |

**Table S6.** Atomic ratio of element in the FeP-Ni<sub>2</sub>P-CoP/NF before and after HER determined by XPS.

| Catalyst  | Atomic ratio of element (%) |                  |                  |                  |                  |                  |
|-----------|-----------------------------|------------------|------------------|------------------|------------------|------------------|
|           | Co <sup>3+</sup>            | Co <sup>2+</sup> | Fe <sup>3+</sup> | Fe <sup>2+</sup> | Ni <sup>3+</sup> | Ni <sup>2+</sup> |
| Initial   | 74.86                       | 25.14            | 63.16            | 36.85            | 64.11            | 35.88            |
| After HER | 64.5                        | 35.5             | 32.83            | 67.18            | 44.62            | 55.38            |

## References

1. Y. Xu, J. Yang, T. Liao, R. Ge, Y. Liu, J. Zhang, Y. Li, M. Zhu, S. Li and W. Li, Bifunctional water splitting enhancement by manipulating Mo-H bonding energy of transition Metal-Mo<sub>2</sub>C heterostructure catalysts, *Chem. Eng. J.*, 2022, **431**, 134126.
2. J. Qian, X. Wang, H. Jiang, S. Li, C. Li, S. Li, R. Ma and J. Wang, Surface Engineering of Cr-Doped Cobalt Molybdate toward High-Performance Hydrogen Evolution, *ACS Appl. Mater. Interfaces*, 2022, **14**, 18607–18615.
3. H. Xiong, C. Du, Z. Ma, R. Zhi, S. Hao, X. Zhao, Z. Liu, F. Xu and H. Wang, Rational Design of Multiple Heterostructures with Synergistic Effect for Efficient and Stable Hydrogen Evolution Toward Industrial Alkaline Water Splitting, *Adv. Funct. Mater.*, 2024, **34**, 2402298.
4. X. Luo, L. Wang, W. Sun, Z. Yang, P. Zhang, X. Chen and G. Liu, One-Step Electrodeposition of NiMoP/NF as an Efficient and Cost-Effective Cathodic Electrocatalyst for Alkaline Water Electrolysis, *Ind. Eng. Chem. Res.*, 2023, **62**, 10454–10466.
5. Y. Cao, X. Yin, Y. Gan, Y. Ye, R. Cai, B. Feng, Q. Wang, X. Dai and X. Zhang, Coupling effect and electronic modulation for synergistically enhanced overall alkaline water splitting on bifunctional Fe-doped CoB<sub>2</sub>/CoP nanoneedle arrays, *J. Colloid Interface Sci.*, 2023, **652**, 1703-1711.
6. I. K. Mishra, H. Zhou, J. Sun, F. Qin, K. Dahal, J. Bao, S. Chen and Z. Ren, Hierarchical CoP/Ni<sub>5</sub>P<sub>4</sub>/CoP microsheet arrays as a robust pH-universal electrocatalyst for efficient hydrogen generation†, *Energy Environ. Sci.*, 2018, **11**, 2246-2252.
7. L. Yang, X. Cao, X. Wang, Q. Wang and L. Jiao, Regulative electronic redistribution of CoTe<sub>2</sub>/CoP heterointerfaces for accelerating water splitting, *Appl. Catal. B Environ. Energy*, 2023, **329**, 122551.
8. X. Xia, G. Zhao, Q. Yan, B. Wang, Q. Wang and H. Xie, High-Density Defects Activating Fe-Doped Molybdenum Sulfide@N-Doped Carbon Heterostructures for Efficient Electrochemical Hydrogen Evolution, *ACS Sustain. Chem. Eng.*, 2022, **10**, 182–193.

9. C.-C. Cheng, T.-Y. Lin, Y.-C. Ting, S.-H. Lin, Y. Choi and S.-Y. Lu, Metal-organic frameworks stabilized Mo and W binary single-atom catalysts as high performance bifunctional electrocatalysts for water electrolysis, *Nano Energy*, 2023, **112**, 108450.
10. T. Li, H. Chen, Z. Chen, Z. Xue, X. Zhang and B. Hui, Scale-Up Preparation of Flexible Ni–W–P@Fiber Cloth Electrode for Boosting Overall Water Electrosplitting, *ACS Sustain. Chem. Eng.*, 2023, **11**, 14549–14558
11. Y. Zhao, X. Zhao, Y. Zhou, S. Zhao, J. Chen, R. Dai, W. Zhou, P. Yang, H. Zhang and A. Chen, Bimetallic co-doped CoP nanoflower arrays for efficient and stable overall water splitting, *Int. J. Hydrogen Energy*, 2024, **51**, 276-284.
12. C. Liu, J. Feng, P. Zhou, D. Liu, L. Qiao, D. Liu, Y. Cao, S.-C. Su, H. Liu and H. Pan, Multi-metal interaction boosts reconstructed FeCoCrCuO<sub>x</sub>@CF toward efficient alkaline water electrolysis under large current density, *Chem. Eng. J.*, 2023, **476**, 146710.
13. D. Kong, Q. Xu, N. Chu, H. Wang, Y. V. Lim, J. Cheng, S. Huang, T. Xu, X. Li, Y. Wang, Y. Luo and H. Y. Yang, Rational Construction of 3D Self-Supported MOF-Derived Cobalt Phosphide-Based Hollow Nanowall Arrays for Efficient Overall Water Splitting At large Current Density, *Small*, 2024, **20**, 2310012.
14. M. Qin, G. Ma, W. Tan, Z. Fan and X. Xin, Constructing an n-n junction between CoFe-LDH and NiCoP as bifunctional electrocatalysts for efficient overall water splitting, *Inorg. Chem. Front.*, 2023, **10**, 4819-4828.
15. Y. Gao, W. He, D. Cao, F. Wang, Y. Li, Q. Hao, C. Liu and H. Liu, Mo-Doped Ni<sub>3</sub>S<sub>2</sub> Nanosheet Arrays for Overall Water Splitting, *ACS Appl. Nano Mater.*, 2023, **6**, 6066-6075.
16. N. Chen, S. Che, H. Liu, G. Li, N. Ta, F. J. Chen, B. Jiang, N. Wu, Z. Li, W. Yu, F. Yang and Y. Li, Multistage interfacial engineering of 3D carbonaceous Ni<sub>2</sub>P nanospheres/nanoflowers derived from Ni-BTC metal-organic frameworks for overall water splitting, *J. Colloid Interface Sci.*, 2023, **638**, 582-594.
17. K. Zhang, Y. Duan, N. Graham and W. Yu, Unveiling the synergy of polymorph heterointerface and sulfur vacancy in NiS/Ni<sub>3</sub>S<sub>2</sub> electrocatalyst to promote alkaline hydrogen evolution reaction, *Appl. Catal. B Environ. Energy*, 2023, **323**, 122144.
18. N. Yang, W. Yang, X. Yang, X. Xiao, L. Zhang and L. Zhang, 2D/3D hierarchical and

- multi-heterostructured Co/Ni/Fe phosphosulfide as a highly efficient bifunctional electrocatalyst for overall water splitting, *Int. J. Hydrogen Energy*, 2024, **56**, 396-405.
19. J. Zhou, C. Huang, Q. Zhou, Y. Xie, L. Yang, L. Yu and Y. Yu, Electronic Structure Regulation of Nickel Phosphide for Efficient Overall Water Splitting, *Inorg. Chem.*, 2022, **61**, 9318–9327
  20. Q. Li, J. Bi, Y. Yao, X. Li and D. Xu, A novel 3D CoNiCu-LDH@CuO micro-flowers on copper foam as efficient electrocatalyst for overall water splitting, *Appl. Surf. Sci.*, 2023, **622**, 156874.
  21. Y. Li, X. Yu, J. Gao and Y. Ma, Structural and electronic modulation of (Fe,Ni)<sub>2</sub>P@Ni<sub>2</sub>P heterostructure for efficient overall water splitting at high current density, *Chem. Eng. J.*, 2023, **470**, 144373.
  22. Y. Li, H. Guo, Y. Zhang, H. Zhang, J. Zhao and R. Song, Hollow Mo-doped NiS<sub>x</sub> nanoarrays decorated with NiFe layered double-hydroxides for efficient and stable overall water splitting, *J. Mater. Chem. A*, 2022, **10**, 18989-18999.
  23. Y. Wei, L. Yi, R. Wang, J. Li, D. Li, T. Li, W. Sun and W. Hu, A Unique Etching-Doping Route to Fe/Mo Co-Doped Ni Oxyhydroxide Catalyst for Enhanced Oxygen Evolution Reaction, *Small*, 2023, **19**, 2301267.
  24. Y. Gao, H. Ding, X. Fan, J. Xiao, L. Zhang and G. Xu, Anchoring cobalt molybdenum nickel alloy nanoparticles on molybdenum dioxide nanosheets as efficient and stable self-supported catalyst for overall water splitting at high current density, *J. Colloid Interface Sci.*, 2023, **648**, 745-754.
  25. K. Chang, D. T. Tran, J. Wang, K. Dong, S. Prabhakaran, D. H. Kim, N. H. Kim and J. H. Lee, Triphasic Ni<sub>2</sub>P-Fe<sub>2</sub>P-CoP heterostructure interfaces for efficient overall water splitting powered by solar energy, *Appl. Catal. B Environ. Energy*, 2023, **338**, 123016.
  26. T. Niyitanga, J. W. Choi and H. Kim, Hierarchical 3D porous trimetallic palladium-iron and cobalt on nickel foam as electrocatalyst for large current density oxygen evolution reaction in alkaline seawater, *J. Colloid Interface Sci.*, 2024, **657**, 229-239.
  27. J. Li, C. Hou, C. Chen, W. Ma, Q. Li, L. Hu, X. Lv and J. Dang, Collaborative Interface Optimization Strategy Guided Ultrafine RuCo and MXene Heterostructure Electrocatalysts for Efficient Overall Water Splitting, *ACS Nano*, 2023, **17**, 10947-10957.

28. E. Jiang, J. Li, X. Li, A. Ali, G. Wang, S. Ma, J. Zhu and P. K. Shen, MoP-Mo<sub>2</sub>C quantum dot heterostructures uniformly hosted on a heteroatom-doped 3D porous carbon sheet network as an efficient bifunctional electrocatalyst for overall water splitting, *Chem. Eng. J.*, 2022, **431**, 133719.
29. H. Li, X. Gao and G. Li, Construction of Co<sub>2</sub>P-Ni<sub>3</sub>S<sub>2</sub>/NF Heterogeneous Structural Hollow Nanowires as Bifunctional Electrocatalysts for Efficient Overall Water Splitting, *Small*, 2023, **19**, 2304081.
30. C. Zhang, Y. Han, W. Wang, R. Huang, R. Ma and J. Yan, Engineering MIL-88A-Derived Self-Supported Moss-like Iron Phosphide Particles on Nickel Foam as Robust Bifunctional Electrocatalysts for Overall Water Splitting, *ACS Appl. Energy Mater.*, 2022, **5**, 9392-9401.
31. Y. Dong, Z. Deng, Z. Xu, G. Liu and X. Wang, Synergistic Tuning of CoO/CoP Heterojunction Nanowire Arrays as Efficient Bifunctional Catalysts for Alkaline Overall Water Splitting, *Small Methods*, 2023, **7**, 2300071.
32. D. Kim, Y. Lee, M. Kim, G. Lee and S. M. N. Jeghan, Designing a smart heterojunction coupling of cobalt-iron layered double hydroxide on nickel selenide nanosheets for highly efficient overall water splitting kinetics, *Appl. Catal. B Environ. Energy*, 2022, **308**, 121221.
33. Y. Huang, X. Ding, B. Huang and Z. Xie, CeO<sub>2</sub>-decorated Fe-doped Ni<sub>2</sub>P nanosheets for efficient electrocatalytic overall water splitting at high current densities, *J. Alloys Compd.*, 2024, **981**, 173672.
34. X. Ding, J. Yu, W. Huang, D. Chen, W. Lin and Z. Xie, Modulation of the interfacial charge density on Fe<sub>2</sub>P-CoP by coupling CeO<sub>2</sub> for accelerating alkaline electrocatalytic hydrogen evolution reaction and overall water splitting, *Chem. Eng. J.*, 2023, **451**, 138550.
35. Q. Liu, K. Chen, M. Wang, H. Fan, Z. Yan, X. Du and Y. Chen, In-situ construction of cation vacancies in amphoteric-metallic element-doped NiFe-LDH as ultrastable and efficient alkaline hydrogen evolution electrocatalysts at 1000 mA cm<sup>-2</sup>, *J. Colloid Interface Sci.*, 2024, **663**, 624-631.
36. P. Viswanathan and K. Kim, In Situ Surface Restructuring of Amorphous Ni-Doped



- CoMo Phosphate-Based Three-Dimensional Networked Nanosheets: Highly Efficient and Durable Electrocatalyst for Overall Alkaline Water Splitting, *ACS Appl. Mater. Interfaces*, 2023, **15**, 16571-16583.
37. L. Zeng, L. An, Z. Zhang, J. Zheng, W. Chen, C. Liu, Y. Zheng, D. Dang and Z.-Q. Liu, Heterogeneous strategy constructing a built-in electric field: CoP/FeP bifunctional electrode for overall water splitting, *Chem. Eng. J.*, 2024, **491**, 152084.
38. D. C. Cha, T. I. Singh, A. Maibam, T. H. Kim, D. H. Nam, R. Babarao and S. Lee, Metal-Organic Framework-Derived Mesoporous B-Doped CoO/Co@N-Doped Carbon Hybrid 3D Heterostructured Interfaces with Modulated Cobalt Oxidation States for Alkaline Water Splitting, *Small*, 2023, **19**, 2301405.
39. G.-L. Li, X.-Y. Qiao, Y.-Y. Miao, T.-Y. Wang and F. Deng, Synergistic Effect of N-NiMoO<sub>4</sub>/Ni Heterogeneous Interface with Oxygen Vacancies in N-NiMoO<sub>4</sub>/Ni/CNTs for Superior Overall Water Splitting, *Small*, 2023, **19**, 2207196.
40. B. Liu, P. Zhao, Z. Wu, C. Liu, H. Jing, J. Song, K. Lu, W. Lei and Q. Hao, Prussian blue analogue-derived CoP nanocubes supported on MXene toward an efficient bifunctional electrode with enhanced overall water splitting, *J. Colloid Interface Sci.*, 2024, **661**, 709-719.
41. F. Tang, Y. W. Zhao, Y. Ge, Y.-G. Sun, Y. Zhang, X.-L. Yang, A.-M. Cao, J.-H. Qiu and X.-J. Lin, Synergistic effect of Mn doping and hollow structure boosting Mn-CoP/Co<sub>2</sub>P nanotubes as efficient bifunctional electrocatalyst for overall water splitting, *J. Colloid Interface Sci.*, 2022, **628**, 524-533.
